# Supplementary material for: Characterizing Cerebral Imaging and Electroclinical Features of Five Pseudohypoparathyroidism Cases Presenting with Epileptic Seizures
Source: Behav Neurol. 2022 Aug 12;2022:8710989. doi: 10.1155/2022/8710989 (PMC9391127; doi:10.1155/2022/8710989)
Supplement: Supplementary Materials — Table S1: summary of literature survey on published cohorts and clinical reports of PHP patients. We collected a total of 257 PHP patients and the following information from the collected publications: number of patients in each study or case report; patient information including clinical symptoms, age, age of onset, and molecular subtype of PHP; whether the patients were PTH-resistant, hypocalcemia, and hyperphosphatemia; whether epilepsy and tetany occurred at the same time; and EEG records and imaging testing results. [file 8710989.f1.txt]

index	pmid	Year	reference	# patients	"patient sex
 (M/F)"	age	age of onset	"molecular
subtype"	PTH resistence	hypocalcemia	hyperphosphatemia 	seizure	seizure type	Tetany	EEG	brain imaging 	Weighted MRI	"other 
symptoms"	"other imaging 
results"
"Lu D, 2021"	33422028	2021	BMC endocrine disorders 2021	1	male	26		PHP1a	Yes	Yes	Yes	Yes				heterotopic calcification in basal ganglia and cerebellum			
"Luo Dandan, 2021"	33513624	2021	Hormone and Metabolic Research	1	Male	18		PHP1b	no	Yes	Yes	Yes		None					
"Najim M, 2021"	32844075	2021	Intractable and Rare Diseases Research	1	Female	34		-	Yes	Yes	Yes	Yes		None		"bilateral  symmetrical  calcifications of basal ganglia, cerebellar dentate nuclei, and  subcortical  white  matter."			
"Zhang Chao, 2020"	32715645	2020	Molecular Genetics and Genomic Medicine	1	male	15			Yes	Yes	Yes	Yes	involuntary  movement  episodes	None	"paroxysmal low and medium amplitude slow waves, isolated sharp waves, and sharp slow-wave release occurred in the right prefrontal temporal cortex"	"multiple calcifications bilaterally in the cortex of the frontal and parietal lobes, and the thalamus. Calcifications are also apparent in the basal ganglia and centrum semiovale."	"T1: showing hypointensities bilaterally in the cortex of the frontal and parietal lobes cortex, and the thalamus; in the basal ganglia and centrum semiovale.
T2: showing isointensities in these regions"	Paroxysmal dyskinesia 	
"Nand N, 2015"	27608698	2015	J Assoc Physicians India	1	male	22			Yes	Yes	Yes	Yes	generalized tonic seizure	None		normal		"History of poormemory and concentration, fatigue and on and off constipation"	
"Nand N, 2015"	27608698	2015	J Assoc Physicians India	1	Female	24			Yes	Yes	Yes	Yes	generalized tonic-clonic seizures	NOne		bilateral basal gangliacalcification and calcification at grey-white matter junction			
"Gomes R, 2020"		2020	Sri Lanka Journal of Diabetes Endocrinology and Metabolism	1	Female	18			Yes	Yes	Yes	Yes	 generalised  tonic¨Cclonic   seizures 	NOne		"bilateral symmetrical calcification of the caudate nucleus, lenticular nucleus (putamen and globus pallidus), thalamus, paraventricular region (figure 1)  and also over both fronto parietalregion"			
"Tang Yuchen, 2020"	32481259	2020	Medicine	1	Female	9		PHP1a	Yes	Yes	Yes	Yes		None		"lateral calcifications in variousregions of cerebrum and cerebellum, especially the basal ganglia"			
"Purohit S, 2020"	33585324	2020	"J Orthop Case Rep
."	1	Female	11			Yes	Yes	Yes	Yes	generalized tonic-clonic seizures	NOne					
"De Silva SW, 2019"	31856822	2019	BMC Endocrine Disorders	1	male	59			Yes	Yes	Yes	Yes	generalized seizures	NOne		CT: extensive cerebral calcifications in cerebral cortex and cerebellar hemispheres; MRI:bilateral basal ganglia thalamic anddentate ganglia calcification			
"Onyiriuka Alphonsus N, 2019"		2019	Int J Child Adolesc Health	1	male	15			Yes	Yes	Yes	Yes	generalized  tonic-clonic  seizure						
"Mukherjee, Soham 2019"	31686738	2019	Indian Journal of Clinical Biochemistry	1	Female	10.5	8		Yes	Yes	Yes	Yes	undefined	none		bilateral basal ganglia calcification			
"Kutilek, Stepan 2019"		2019	Bone Abstracts	1	male	16	12	PHP1b	Yes	Yes	Yes	Yes	partial seizure	NOne		basal ganglia calcifications			
"Patrizia Del Monte, 2019"	30729047	2019	Case Rep Endocrinol	1	female	64		PHP1a	Yes	Yes	Yes	Yes				"calcifications of the basal ganglia, cortical and subcortical white matter, and cerebellum"			
Mar¨ªa Camila Trejo 2017		2017	Revista Facultad de Medicina	1	male	22	13		Yes	Yes	Yes	Yes	generlized tonic-clonic seizure	None		"calcification of the deep cerebellar gray nuclei, the pale globe and some subcortical regions"			
Mar¨ªa Camila Trejo 2017		2017	Revista Facultad de Medicina	1	Female	23	15		Yes	Yes	Yes	Yes	generlized tonic-clonic seizure			"multiple supra and infratentorial calcifications, predominantly in the bilateral basal ganglia region and the thalami;"			
Mar¨ªa Camila Trejo 2017		2017	Revista Facultad de Medicina	1	male	21			Yes	Yes	Yes	Yes	tonic clonic seizure			"bilateral calcifications in the basal, thalamic and subcortical nuclei"			
Chengyuan Song 2016	28296742	2016	Medicine	1	male	22	3		Yes	Yes	Yes	Yes	undefined			bilateral calcification in the Basal ganglia			
"Robert Nisenbaum, 2019"		2019	Proceedings of UCLA Health	1	male	54			Yes	Yes	Yes	Yes				"Marked symmetrical calcification of the basal ganglia, cere-bellum,  and  the  brain  white  matter "			
Pooja Raghavan 2012	23754923	2012	Int Med Case Rep J	1	female	23		PHP1a	Yes	Yes	Yes	Yes				calcifications within the cerebellar hemispheres bilaterally in the basal ganglia and in the parenchyma of the brain			
Christian Ritter 2015	25943944	2015	The lancet	1	male	21			Yes	Yes	Yes	Yes				extensive  brain calcification			
Yeji Kwon 2015	26187296	2015	Journal of neurological science	1	female	27			Yes	Yes	Yes	Yes		Yes	occasional spikes in both temporal areas	bilateral calcification in the Basal ganglia			
"Tan XP, 2021"	33660862	2021	Annals of the New York Academy of Sciences 2021	1	Female	34			Yes	Yes	Yes	None		None		symmetric intracranialcalcification in bilateral basal ganglia and subcortical region in the frontal lobe		symptomatic spinal cord compression;	multilevel spinal stenosis at the T2-T3 level.
"E Silva J, 2021"	33320452	2021	Archives of Endocrinology and Metabolism	1	Female	34		PHP type 1b	no	no	Yes	None		None					
"Marin F, 2021"	33818044	2021	Journal of Pediatric Endocrinology and Metabolism	1	Male	20		PHP type 1b	Yes	Yes	Yes	None		None		bilateral calcifications of the basal ganglia			
"Luo Dandan, 2021"	33513624	2021	Hormone and Metabolic Research	1	Female	54		PHP type 1b	no	Yes	Yes	None		None					
"Diniz BL, 2021"	33552638	2021	Journal of Pediatric Genetics	1	Female	2m13d		PHP1a	Yes	Yes	no	None		None					periostea calcification
"Netanja I Harlianto, 2021"	34381851	2021	Bone Reports	1	Female	74		PHP1a	Yes	Yes	no	None		None					cervical ossification
"Poon SWY, 2020"	33224538	2020	Case Reports in Endocrinology	1	Female		2mon	PHP1a	Yes	Yes	Yes	None		None		normal		headache	
"Antich BC, 2020"		2020	Endocrine Abstracts	1	male	28		PHP1a	Yes	Yes	Yes	None		None		basal ganglia calcication			
"Anum Fasih, 2019"	30931261	2019	Eur J Case Rep Intern Med	1	male	22	17	PHP1b	Yes	Yes	Yes	NOne		None					
"Luca SP, 2019"	30809832	2019	Pediatric Dermatology	1	male	13		PHP1a	Yes	no	no	None		None					
"Luca SP, 2019"	30809832	2019	Pediatric Dermatology	1	male	13		PPHP	no	no	no	None		None					
"Luca SP, 2019"	30809832	2019	Pediatric Dermatology	1	Female	10		PHP1a	no	no	no	None		None					
"Rahul Valsaraj, 2019"		2019	Indian Journal of Case Reports	1	Female	27			Yes	Yes	Yes	none		none				avascular necrosis	
"Yuya Kobayashi, 2018"	29033417	2018	Internal medicine	1	Female	51			Yes	Yes	Yes	none		none		"extensive calcification in the bilateral globi pallidi, dentate nuclei, and subcortical white matter"			
Catarina Garcia 2018	28648114	2018	Paediatrics and international child health	1	male	16	14		Yes	Yes	Yes	none		Yes		multiple subcortical and diffuse basal ganglia calcifications		involuntary dystonic movements	
Mar¨ªa Camila Trejo 2017		2017	Revista Facultad de Medicina	1	Female	25			Yes	Yes	Yes	None							
JC Odone 2018	abstract	2018	Archi Dis Child	1	Female	8			Yes	Yes	Yes	none		none		white matter calcification			
"Xiaodan Long, 2018"	30060753	2018	BMC Medical Genetics	1	male	18		PHP1a	yes	no	yes	none		none					
Chengyuan Song 2016	28296742	2016	Medicine	1	Female	52			Yes	Yes	Yes	none				bilateral calcification in the Basal ganglia			
Naile Gokkaya 2017	abstract	2017	Endocrine Abstracts	1	male	17			Yes	Yes	Yes	none				calcification of basal ganglia			
"Yunling Li, 2020"	32110670	2020	World J Clin Cases	1	male	5			Yes	Yes	Yes	None		no	normal	normal		cutaneous nodules	
"Fabio Sippelli, 2021"		2021	Scienze Medico Biologiche	3	Female sisters				Yes	Yes	Yes	no		no					
Yamato Keidai 2021	abstract	2021	J Endocrine Soc	2	Female twin	26		PHP1b	Yes	Yes	Yes	no		no					
M Alvarez 2019	abstract	2019	Researchgate poster	1	female	37			Yes	Yes	Yes	no		no					
Irket Kadilli 2015	26160055	2015	General Hospital Psychiatry	1	female	36			Yes	Yes	Yes	no				"calcifications are evident in cerebral basal ganglia (caudate and lenticular nucleus, arrows) and insubcutaneous tissues "			
Yeji Kwon 2015	26187296	2015	Journal of neurological science	1	male	25			Yes	Yes	Yes	no		Yes	normal	normal 			
Hyen Lee 2017		2017	Journal of Genetic Medicine	1	female	8		PHP1b	Yes	Yes	Yes	no				Calcifications in both basal ganglia			
Aaron R Kuzel 2017	29387507	2017	Cureus	1	male	41			Yes	Yes	Yes	no		no					
Xueying Chu 2017	29136292	2017	Clinical Endocrinology	104	"56 male, 48 female"							49 patients		93 patients		basal calcification was found in 87 out 92 patients under tests			
"Cindy Colson, 2019"	30905746	2019	Bone	33	"17 males, 16 female"			PHP1b											
"Jane Hejlesen, 2020"	31892351	2020	BMC Oral Health	29	"23 female, 6 male"				Yes	Yes	Yes								
David W Hansen 2018	29699796	2018	Journal of Pediatrics	19	"11 female, 8 male"				Yes	Yes	Yes							Nephrocalcinosis 	
Bhadada SK 2011	21891938	2011	Neurol India	19															
																			
				257															
